# Supplementary material for: The effect of Virtual Reality on evoked potentials following painful electrical stimuli and subjective pain
Source: PubMed Central journal article supplement (PMC7270181; doi:10.1038/s41598-020-66035-4), 2020-06-03
Supplement: 41598_2020_66035_MOESM1_ESM.pdf [file 41598_2020_66035_MOESM1_ESM.pdf]

## Supplementary file 1

### Manuscript: The effect of Virtual Reality on evoked potentials following painful electrical stimuli and subjective pain

E.J. Lier\*<sup>1</sup>, J. M. Oosterman <sup>2</sup>, R. Assmann<sup>1</sup>, M. de Vries<sup>1</sup>, H. van Goor<sup>1</sup>

1. Department of Surgery, Radboud university medical center Nijmegen, The Netherlands. 2. Radboud University, Donders Institute for Brain, Cognition and Behaviour, Nijmegen, The Netherlands

**Table 1. Personal characteristics**

| Subject characteristics (N=29)                                                                                                                                                                                              |                  |
|-----------------------------------------------------------------------------------------------------------------------------------------------------------------------------------------------------------------------------|------------------|
| Gender <sup>a</sup>                                                                                                                                                                                                         |                  |
| - Male                                                                                                                                                                                                                      | 18 (62.1%)       |
| - Female                                                                                                                                                                                                                    | 11 (37.9%)       |
| Age (years) <sup>b</sup>                                                                                                                                                                                                    | 36.3 (14.4)      |
| Creativity questionnaire <sup>b,c</sup>                                                                                                                                                                                     | 37.4 of 50 (3.8) |
| Previous VR experience <sup>a</sup>                                                                                                                                                                                         |                  |
| - Yes                                                                                                                                                                                                                       | 18 (62.1%)       |
| - No                                                                                                                                                                                                                        | 11 (37.9%)       |
| VR experience (hours) <sup>b</sup>                                                                                                                                                                                          | 3.1 (9.5)        |
| Level of immersion <sup>b,d</sup>                                                                                                                                                                                           |                  |
| - Passive VR                                                                                                                                                                                                                | 21.8 (3.8) of 30 |
| - Active VR                                                                                                                                                                                                                 | 25.2 (3.2) of 30 |
| <i>a: n(%), b: mean (sd)</i><br><i>c: maximum score 50 indicates high level of creativity, such as using visualisation often in daily life.</i><br><i>d: maximum score of 30 : maximally immersed in the virtual world.</i> |                  |

**Figure 1. Flow diagram of subjects (Conditions: C=control, P=Passive Virtual Reality, A=Active Virtual Reality)**

**Figure 2. Correlations of age and  $\Delta$  pain scores for active VR minus baseline (n.s.), passive VR minus baseline ( $r=-0.635$ ,  $p<0.001$ ) and active VR minus passive VR (n.s.).**
